# Supplementary material for: Transcriptional profiling of Klebsiella pneumoniae defines signatures for planktonic, sessile and biofilm-dispersed cells
Source: PubMed Central journal article supplement (PMC4791964; doi:10.1186/s12864-016-2557-x), 2016-03-15

**Additional file 5: Figure S2**

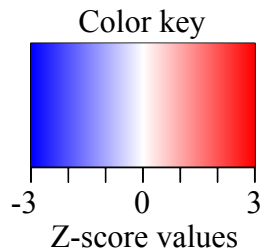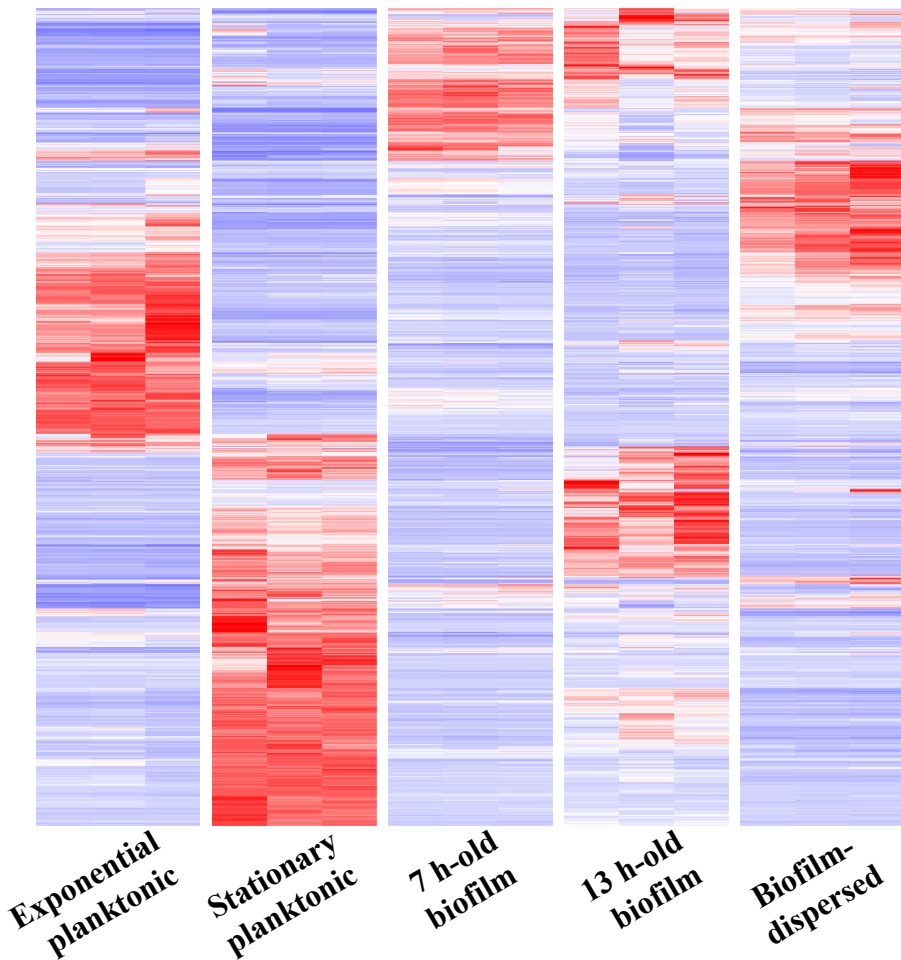

Supplement: 12864_2016_2557_MOESM5_ESM.pdf [file 12864_2016_2557_MOESM5_ESM.pdf]
