# Supplementary material for: Transcriptional profiling of Klebsiella pneumoniae defines signatures for planktonic, sessile and biofilm-dispersed cells
Source: PubMed Central journal article supplement (PMC4791964; doi:10.1186/s12864-016-2557-x), 2016-03-15
Supplement: 12864_2016_2557_MOESM7_ESM.pdf [file 12864_2016_2557_MOESM7_ESM.pdf]

**Additional file 7: Figure S4**

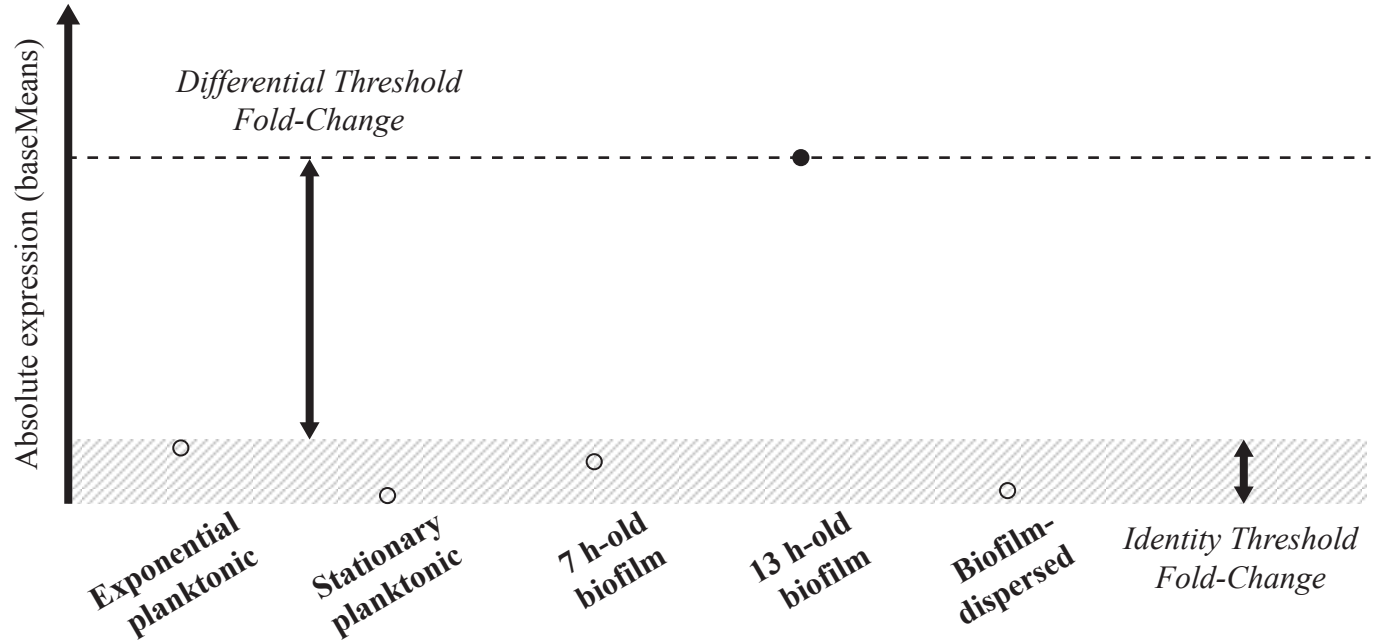

*Differential Threshold Fold-Change*

10

36

4

4

4

*Identity Threshold Fold-Change*

2.5

2.5

2.5

2.5

2.5
